# Supplementary material for: Conserved autism-associated genes tune social feeding behavior in C. elegans
Source: PubMed Central journal article supplement — bioRxiv. 2023 Dec 6:2023.12.05.570116. Preprint. [Version 1] doi: 10.1101/2023.12.05.570116 (PMC10723370; doi:10.1101/2023.12.05.570116), 2023-12-06
Supplement: NIHPP2023.12.05.570116V1-supplement-1.pdf [file NIHPP2023.12.05.570116V1-supplement-1.pdf]

**Supplementary table 1. Conservation of *C. elegans* genes with human autism-associated genes**

| <i>C. elegans</i> gene | Human gene    | SFARI rank | EAGLE score | ~identity (%) |
|------------------------|---------------|------------|-------------|---------------|
| <i>nrx-1</i>           | <i>NRXN1</i>  | 1          | 143.75      | 27            |
|                        | <i>NRXN2</i>  | 1          | 7           | 24            |
|                        | <i>NRXN3</i>  | 1          | 11.1        | 24            |
| <i>nlg-1</i>           | <i>NLGN3</i>  | 1          | 6.5         | 29            |
|                        | <i>NLGN4X</i> | 1          | 12          | 29            |
|                        | <i>NLGN2</i>  | 1          | 3           | 27            |
|                        | <i>NLGN4Y</i> | 2          | /           | 28            |
| <i>glr-1</i>           | <i>NLGN1</i>  | 2          | /           | 28            |
|                        | <i>GRIA2</i>  | 1          | 12          | 37            |
|                        | <i>GRIA3</i>  | S          | /           | 37            |
| <i>glr-2</i>           | <i>GRIA1</i>  | 2          | /           | 37            |
|                        | <i>GRIA2</i>  | 1          | 12          | 37            |
|                        | <i>GRIA3</i>  | S          | /           | 35            |
| <i>avr-15</i>          | <i>GRIA1</i>  | 2          | /           | 37            |
|                        | <i>GLRA2</i>  | 2          | /           | 39            |
|                        | <i>GABRA3</i> | S          | /           | 32            |
|                        | <i>GABRB2</i> | 1          | 0.3         | 31            |
|                        | <i>GABRB3</i> | 1          | /           | 32            |
|                        | <i>GABRA4</i> | 2          | /           | 30            |

Note: Conservation identified from homology searches on flybase, ortholist2, and previous work (refs). SFARI rank and EAGLE score from SFARI gene. % identity from DIOPT comparison of amino acid sequences.

**Supplementary Table 2. *C. elegans* strains by Figure**

| Figure | Figure reference           | Strain identifier | Genotype                                                                                                     | Source             | injection concentration* |
|--------|----------------------------|-------------------|--------------------------------------------------------------------------------------------------------------|--------------------|--------------------------|
| 1      | <i>npr-1</i>               | MPH39             | <i>him-8(e1489) IV; npr-1(ad609) X; otIs525[lim-6int4::gfp]</i>                                              | Hart Lab           |                          |
|        | <i>npr-1</i>               | DA609             | <i>npr-1(ad609) X</i>                                                                                        | CGC                |                          |
|        | <i>nrx-1(null); npr-1</i>  | MPH40             | <i>unc-119(ed3) III; him-8(e1489) IV; nrx-1(wy778[unc-119(+)] V; npr-1(ad609) X; otIs525[lim-6int4::gfp]</i> | Hart Lab           |                          |
|        | <i>nrx-1(null); npr-1</i>  | MPH49             | <i>unc-119(ed3) III; nrx-1(wy778[unc-119(+)] V; npr-1(ad609) X</i>                                           | this study         |                          |
|        | <i>nrx-1(α mut); npr-1</i> | MPH50             | <i>him-8(e1489) IV; nrx-1(gk246237) V; npr-1(ad609) X; otIs525[lim-6int4::gfp]</i>                           | this study         |                          |
|        | <i>nrx-1(α del); npr-1</i> | MPH51             | <i>nrx-1(nu485) V; npr-1(ad609) X</i>                                                                        | this study         |                          |
|        | solitary controls          | OH15098           | <i>him-8(e1489) IV; otIs525[lim-6int4::gfp]</i>                                                              | Hart & Hobert 2018 |                          |

|   |                                                                                                   |         |                                                                                                                                                                                    |                    |                |
|---|---------------------------------------------------------------------------------------------------|---------|------------------------------------------------------------------------------------------------------------------------------------------------------------------------------------|--------------------|----------------|
|   | <i>nrx-1(null)</i>                                                                                | TV13570 | <i>unc-119(ed3) III, nrx-1(wy778[unc-119(+)] V</i>                                                                                                                                 | CGC                |                |
|   | <i>nrx-1(<math>\alpha</math> mut)</i>                                                             | OH15116 | <i>him-8(e1489) IV; nrx-1(gk246237) V; otIs525[lim-6int4::gfp]</i>                                                                                                                 | Hart & Hobert 2018 |                |
|   | <i>nrx-1(<math>\alpha</math> del)</i>                                                             | TV22997 | <i>nrx-1(nu485) V</i>                                                                                                                                                              | Tong et al. 2017   |                |
| 2 | <i>npr-1; nrx-1(null); ric-19p::nrx-1(<math>\gamma</math>)</i>                                    | MPH52   | <i>unc-119(ed3) III; nrx-1(wy778[unc-119(+)] V; npr-1(ad609) X; hpmEx3[ric-19p::sfGFP::nrx-1(<math>\gamma</math>); ttx-3::mCherry]</i>                                             | this study         |                |
|   | <i>npr-1; nrx-1(null); ric-19p::nrx-1(<math>\alpha</math>)</i>                                    | IV870   | <i>unc-119(ed3) III, him-8(e1489) IV; nrx-1(wy778[unc-119(+)] V; npr-1(ad609) X; otIs525[lim-6int4::gfp]; ueEx601[ric-19p::sfGFP::nrx-1(<math>\alpha</math>); unc-122p::dsRed]</i> | this study         |                |
|   | <i>npr-1; nrx-1(null); flp-21p::nrx-1(<math>\alpha</math>)</i>                                    | IV874   | <i>unc-119(ed3) III, him-8(e1489) IV; nrx-1(wy778[unc-119(+)] V; npr-1(ad609) X; otIs525[lim-6int4::gfp]; ueEx605[flp-21p::sfGFP::nrx-1(<math>\alpha</math>); unc-122::dsRed]</i>  | this study         |                |
|   | <i>npr-1; nrx-1(null); nhr-79p::nrx-1(<math>\alpha</math>)</i>                                    | IV878   | <i>unc-119(ed3) III, him-8(e1489) IV; nrx-1(wy778[unc-119(+)] V; npr-1(ad609) X; otIs525[lim-6int4::gfp]; ueEx609[nhr-79p::sfGFP::nrx-1(<math>\alpha</math>); unc-122::dsRed]</i>  | this study         |                |
|   | <i>npr-1; nrx-1(null); ric-19p::nrx-1(<math>\alpha</math>)</i>                                    | MPH53   | <i>unc-119(ed3) III; nrx-1(wy778[unc-119(+)] V; npr-1(ad609) X; ueEx611[ric-19p::sfGFP::nrx-1(<math>\alpha</math>); unc-122p::dsRed]</i>                                           | this study         |                |
|   | <i>npr-1; nrx-1(null); nhr-79p::nrx-1(<math>\alpha</math>)</i>                                    | MPH54   | <i>unc-119(ed3) III, nrx-1(wy778[unc-119(+)] V; npr-1(ad609) X; ueEx609[nhr-79p::sfGFP::nrx-1(<math>\alpha</math>); unc-122::dsRed]</i>                                            | this study         |                |
|   | <i>npr-1; nrx-1(null); srv-3p::nrx-1(<math>\alpha</math>)</i>                                     | MPH55   | <i>unc-119(ed3) III, nrx-1(wy778[unc-119(+)] V; npr-1(ad609) X; hpmEx9[srv-3p::sfGFP::nrx-1(<math>\alpha</math>); lin-44::gfp]</i>                                                 | this study         |                |
|   | <i>npr-1; nrx-1(null); srv-3p::nrx-1(<math>\alpha</math>); sra-6p::nrx-1(<math>\alpha</math>)</i> | MPH56   | <i>unc-119(ed3) III; nrx-1(wy778[unc-119(+)] V; npr-1(ad609) X; hpmEx9[srv-3p::sfGFP::nrx-1(<math>\alpha</math>); lin-44::gfp]</i>                                                 | this study         | 45 ng/ $\mu$ l |
|   | <i>npr-1; nrx-1(null); sra-</i>                                                                   | MPH57   | <i>unc-119(ed3) III; nrx-1(wy778[unc-119(+)] V; npr-1(ad609) X; him-8(e1489) IV;</i>                                                                                               | this study         | 45 ng/ $\mu$ l |

|   |                                               |        |                                                                                                                                                                |            |          |
|---|-----------------------------------------------|--------|----------------------------------------------------------------------------------------------------------------------------------------------------------------|------------|----------|
|   | <i>6p::nrx-1(α)</i>                           |        | <i>otIs525[lim-6int4::gfp]; hpmEx10[sra-6p::sfGFP::nrx-1(α); unc-122::dsRed]</i>                                                                               |            |          |
| 3 | <i>npr-1; nlg-1</i>                           | MPH43  | <i>him-8(e1489) IV; npr-1(ad609) X; nlg-1(ok259) X; otIs525[lim-6int4::gfp]</i>                                                                                | Hart Lab   |          |
|   | solitary controls                             | N2     | Bristol lab control strain                                                                                                                                     | CGC        |          |
|   | <i>nlg-1</i>                                  | VC228  | <i>nlg-1(ok259) X</i>                                                                                                                                          | CGC        |          |
|   | <i>npr-1; nlg-1; ric-19p::nlg-1</i>           | IV930  | <i>npr-1(ad609) X; nlg-1(ok259) X; ueEx645[ric-19p::sfGFP::nlg-1; lin-44::gfp]</i>                                                                             | this study |          |
|   | <i>npr-1; nlg-1; nhr-79p::nlg-1</i>           | MPH58  | <i>him-8(e1489)IV; npr-1(ad609) X; nlg-1(ok259) X; otIs525[lim-6int4::gfp]; hpmEx11[nhr-79p::sfGFP::nlg-1; lin-44::gfp]</i>                                    | this study |          |
|   | <i>npr-1; nlg-1; nlp-56p::nlg-1</i>           | MPH59  | <i>him-8(e1489) IV; npr-1(ad609) X; nlg-1(ok259) X; otIs525[lim-6int4::gfp]; hpmEx12[nlp-56p::sfGFP::nlg-1; ttx-3::mCherry]</i>                                | this study | 40 ng/μl |
|   | <i>npr-1; nrx-1; nlg-1</i>                    | MPH44  | <i>unc-119(ed3) III; him-8(e1489) IV; nrx-1(wy778[unc-119(+)] V; npr-1(ad609) nlg-1(ok259) X; otIs525[lim-6int4::gfp]</i>                                      | this study |          |
| 4 | <i>npr-1; eat-4</i>                           | MPH60  | <i>eat-4(ky5) III; npr-1(ad609) X; otIs525[lim-6int4::gfp]</i>                                                                                                 | this study |          |
|   | <i>npr-1; eat-4; nhr-79p::eat-4</i>           | MPH61  | <i>eat-4(ky5) III; npr-1(ad609) X; otIs525[lim-6int4::gfp]; hpmEx13[nhr-79p::eat-4::SL2::gfp; ttx-3::mCherry]</i>                                              | this study |          |
|   | <i>npr-1; eat-4; srv-3p::eat-4</i>            | MPH62  | <i>eat-4(ky5) III; npr-1(ad609) X; otIs525[lim-6int4::gfp]; hpmEx14[srv-3p::eat-4::SL2::gfp; ttx-3::mCherry]</i>                                               | this study |          |
|   | <i>npr-1; eat-4; sra-6p::eat-4</i>            | MPH63  | <i>eat-4(ky5) III; npr-1(ad609) X; otIs525[lim-6int4::gfp]; hpmEx15[sra-6p::eat-4::SL2::gfp; ttx-3::mCherry]</i>                                               | this study |          |
|   | <i>npr-1; nrx-1; eat-4</i>                    | MPH64  | <i>eat-4(ky5) III; unc-119(ed3) III; nrx-1(wy778[unc-119(+)] V; npr-1(ad609) X; otIs525[lim-6int4::gfp]</i>                                                    | this study |          |
|   | <i>npr-1; nrx-1; eat-4; nhr-79p::eat-4</i>    | MPH65  | <i>eat-4(ky5) III; unc-119(ed3) III; nrx-1(wy778[unc-119(+)] V; npr-1(ad609) X; otIs525[lim-6int4::gfp]; hpmEx13[nhr-79p::eat-4::SL2::gfp; ttx-3::mCherry]</i> | this study |          |
|   | <i>npr-1; nrx-1; eat-4; nhr-79p::nrx-1(α)</i> | MPH66  | <i>eat-4(ky5) III; unc-119(ed3) III; nrx-1(wy778[unc-119(+)] V; npr-1(ad609) X; ueEx609[nhr-79p::sfGFP::nrx-1(α); unc-122::dsRed]</i>                          | this study |          |
|   | <i>eat-4</i>                                  | MT6308 | <i>eat-4(ky5) III</i>                                                                                                                                          | CGC        |          |

|   |                             |         |                                                                                                                   |              |  |
|---|-----------------------------|---------|-------------------------------------------------------------------------------------------------------------------|--------------|--|
|   | <i>npr-1; nlg-1; eat-4</i>  | MPH67   | <i>eat-4(ky5) III; npr-1(ad609) nlg-1(ok259) X; otIs525[lim-6int4::gfp]</i>                                       | this study   |  |
|   | <i>npr-1; glr-1</i>         | MPH68   | <i>glr-1(n2461) III; npr-1(ad609) X</i>                                                                           | this study   |  |
|   | <i>npr-1; glr-2</i>         | MPH69   | <i>glr-2(ok2342) III; npr-1(ad609) X</i>                                                                          | this study   |  |
|   | <i>npr-1; avr-15</i>        | MPH70   | <i>avr-15(ad1051) V; npr-1(ad609) X</i>                                                                           | this study   |  |
|   | <i>npr-1; nrx-1; glr-1</i>  | MPH71   | <i>glr-1(n2461) unc-119(ed3) III; nrx-1(wy778[unc-119(+)] V; npr-1(ad609) X; otIs525[lim-6int4::gfp]</i>          | this study   |  |
|   | <i>npr-1; nrx-1; glr-2</i>  | MPH72   | <i>glr-2(ok2342) unc-119(ed3) III; nrx-1(wy778[unc-119(+)] V; npr-1(ad609) X; otIs525[lim-6int4::gfp]</i>         | this study   |  |
|   | <i>npr-1; nrx-1; avr-15</i> | MPH73   | <i>unc-119(ed3) III; nrx-1(wy778[unc-119(+)] avr-15(ad1051) V; npr-1(ad609) X; otIs525[lim-6int4::gfp]</i>        | this study   |  |
| 5 | solitary controls           | CX16921 | <i>kyls673[sra-6:eat-4::pHluorin; unc-122:dsRed]</i>                                                              | Bargmann lab |  |
|   | <i>nrx-1(null)</i>          | MPH74   | <i>unc-119(ed3) III; nrx-1(wy778[unc-119(+)] V; kyls673[sra-6:eat-4::pHluorin; unc-122:dsRed]</i>                 | this study   |  |
|   | <i>npr-1</i>                | MPH75   | <i>npr-1(ad609) X; kyls673[sra-6:eat-4::pHluorin; unc-122:dsRed]</i>                                              | this study   |  |
|   | <i>npr-1; nrx-1(null)</i>   | MPH76   | <i>unc-119(ed3) III; nrx-1(wy778[unc-119(+)] V; npr-1(ad609) X; kyls673[sra-6:eat-4::pHluorin; unc-122:dsRed]</i> | this study   |  |
| 6 | solitary controls           | MPH77   | <i>hpmEx16[svr-3p::gfp::cla-1; lin-44::gfp]</i>                                                                   | this study   |  |
|   | <i>nrx-1(null)</i>          | MPH78   | <i>unc-119(ed3) III; nrx-1(wy778[unc-119(+)] V; hpmEx16[svr-3p::gfp::cla-1; lin-44::gfp]</i>                      | this study   |  |
|   | <i>npr-1</i>                | MPH79   | <i>npr-1(ad609) X; hpmEx16[svr-3p::gfp::cla-1; lin-44::gfp]</i>                                                   | this study   |  |
|   | <i>npr-1; nrx-1(null)</i>   | MPH80   | <i>unc-119(ed3) III; nrx-1(wy778[unc-119(+)] V; npr-1(ad609) X; hpmEx16[svr-3p::gfp::cla-1; lin-44::gfp]</i>      | this study   |  |
|   | solitary controls           | MPH81   | <i>hpmEx17[sra-6:gfp::cla-1; lin-44::gfp]</i>                                                                     | this study   |  |
|   | <i>nrx-1(null)</i>          | MPH82   | <i>unc-119(ed3) III; nrx-1(wy778[unc-119(+)] V; hpmEx17[sra-6:gfp::cla-1; lin-44::gfp]</i>                        | this study   |  |
|   | <i>npr-1</i>                | MPH83   | <i>npr-1(ad609) X; hpmEx17[sra-6:gfp::cla-1; lin-44::gfp]</i>                                                     | this study   |  |
|   | <i>npr-1; nrx-1(null)</i>   | MPH84   | <i>unc-119(ed3) III; nrx-1(wy778[unc-119(+)] V; npr-</i>                                                          | this study   |  |

|        |                                              |         |                                                                                                                                                                 |              |          |
|--------|----------------------------------------------|---------|-----------------------------------------------------------------------------------------------------------------------------------------------------------------|--------------|----------|
|        |                                              |         | <i>1(ad609) X; hpmEx17[sra-6:gfp::cla-1; lin-44::gfp]</i>                                                                                                       |              |          |
|        | <i>npr-1; nrx-1(α mut)</i>                   | MPH85   | <i>nrx-1(gk246237) V; npr-1(ad609) X; hpmEx17[sra-6:gfp::cla-1; lin-44::gfp]</i>                                                                                | this study   |          |
| 7      | <i>flp-21p::pkc-1(gf)</i>                    | CX10252 | <i>kyEx2385[flp-21p::pkc-1(gf)::sl2::gfp; ofm-1::dsred]</i>                                                                                                     | Bargmann lab |          |
|        | <i>nrx-1(null); flp-21p::pkc-1(gf)</i>       | MPH98   | <i>unc-119(ed3) III; nrx-1(wy778[unc-119(+)] V; npr-1(ad609) X; kyEx2385[flp-21p::pkc-1(gf)::sl2::gfp; ofm-1::dsred]</i>                                        | this study   |          |
| Supp 1 | <i>qglR1</i>                                 | QG1     | <i>qglR1 (X, CB4856&gt;N2, npr-1) X</i>                                                                                                                         | this study   |          |
|        | <i>qglR1; nrx-1(null)</i>                    | MPH86   | <i>unc-119(ed3) III, him-8(e1489) IV; nrx-1(wy778[unc-119(+)] V; qglR1 (X, CB4856&gt;N2, npr-1) X; otIs525[lim-6int4::gfp]</i>                                  | this study   |          |
|        | <i>npr-1; nrx-1(null); osm-6p::nrx-1(α)</i>  | MPH87   | <i>unc-119(ed3) III, him-8(e1489) IV; nrx-1(wy778[unc-119(+)] V; npr-1(ad609) X; otIs525[lim-6int4::gfp]; ueEx603[osm-6p::sfGFP::nrx-1(α); unc-122::dsred]</i>  | this study   |          |
|        | <i>npr-1; nrx-1(null); sre-1p::nrx-1(α)</i>  | MPH88   | <i>unc-119(ed3) III, him-8(e1489) IV; nrx-1(wy778[unc-119(+)] V; npr-1(ad609) X; otIs525[lim-6int4::gfp]; hpmEx18[sre-1p::sfGFP::nrx-1(α); unc-122::dsRed]</i>  | this study   |          |
|        | <i>npr-1; nrx-1(null); gcy-36p::nrx-1(α)</i> | MPH89   | <i>unc-119(ed3) III, him-8(e1489) IV; nrx-1(wy778[unc-119(+)] V; npr-1(ad609) X; hpmEx19[gcy-36p::sfGFP::nrx-1(α); unc-122::dsRed]</i>                          | this study   |          |
|        | <i>npr-1; nrx-1(null); flp-8::nrx-1(α)</i>   | MPH90   | <i>unc-119(ed3) III, him-8(e1489) IV; nrx-1(wy778[unc-119(+)] V; npr-1(ad609) X; hpmEx20[flp-8p::sfGFP::nrx-1(α); unc-122::dsRed]</i>                           | this study   |          |
|        | <i>npr-1; nrx-1(null); nlp-56p::nrx-1(α)</i> | MPH91   | <i>unc-119(ed3) III, him-8(e1489) IV; nrx-1(wy778[unc-119(+)] V; npr-1(ad609) X; otIs525[lim-6int4::gfp]; hpmEx21[nlp-56p::sfGFP::nrx-1(α); ttx-3::mCherry]</i> | this study   | 40 ng/μl |
|        | <i>npr-1; nrx-1(null); osm-6p::nrx-1(α)</i>  | MPH20   | <i>unc-119(ed3) III; nrx-1(wy778[unc-119(+)] V; ueEx603[osm-6p::sfGFP::nrx-1(α); unc-122::dsred]</i>                                                            | this study   |          |
|        | <i>npr-1; nrx-1(null); srv-</i>              | MPH97   | <i>unc-119(ed3) III, him-8(e1489) IV; nrx-1(wy778[unc-119(+)] V; npr-1(ad609) X; otIs525[lim-</i>                                                               | this study   |          |

|        |                                    |       |                                                                                                                          |            |          |
|--------|------------------------------------|-------|--------------------------------------------------------------------------------------------------------------------------|------------|----------|
|        | <i>3p::nrx-1(α)</i>                |       | <i>6int4::gfp; hpmEx24[srv-3p::sfGFP::nrx-1(α); lin-44::gfp]</i>                                                         |            |          |
| Supp 2 | <i>npr-1; nlg-1; sra-6p::nlg-1</i> | MPH93 | <i>him-8(e1489) IV; npr-1(ad609) nlg-1(ok259) X; otIs525[lim-6int4::gfp]; hpmEx22[sra-6p::sfGFP::nlg-1; lin-44::gfp]</i> | this study | 40 ng/μl |
|        | <i>npr-1; nlg-1; srv-3p::nlg-1</i> | MPH94 | <i>him-8(e1489) IV; npr-1(ad609) nlg-1(ok259) X; otIs525[lim-6int4::gfp]; hpmEx23[srv-3p::sfGFP::nlg-1; lin-44::gfp]</i> | this study | 40 ng/μl |
|        | <i>npr-1; nlg-1; ins-1p::nlg-1</i> | MPH92 | <i>npr-1(ad609) nlg-1(ok259) X; ueEx651[ins-1p::sfGFP::nlg-1; lin-44::gfp]</i>                                           | this study |          |
|        | <i>nlg-1; sra-6p::nlg-1</i>        | IV937 | <i>nlg-1(ok259) X; ueEx651[ins-1p::sfGFP::nlg-1; lin-44::gfp]</i>                                                        | this study |          |
| Supp 3 | <i>npr-1; nmr-2</i>                | MPH95 | <i>nmr-2(ok3324) V; npr-1(ad609) X</i>                                                                                   | this study |          |
|        | <i>npr-1; mgl-1</i>                | MPH96 | <i>mgl-1(tm1811) X; npr-1(ad609) X</i>                                                                                   | this study |          |

\* 20 ng/μl if not noted

**Supplementary Table 3. Plasmids and promoters**

| Identifier | Construct                        | promoter forward primer            | promoter reverse primer              | promoter size | from       |
|------------|----------------------------------|------------------------------------|--------------------------------------|---------------|------------|
| pMPH34     | <i>ric-19p::sfGF P::nrx-1(α)</i> | CATTAAAGAGTGTGCTC<br>CACGAGCC      | GTTCAAAGTGAAGAGCT<br>CTCTCGAC        | 147           | Hart Lab   |
| pMPH35     | <i>ric-19p::sfGF P::nrx-1(γ)</i> | CATTAAAGAGTGTGCTC<br>CACGAGCC      | GTTCAAAGTGAAGAGCT<br>CTCTCGAC        | 147           | Hart Lab   |
| pMPH38     | <i>osm-6p::sfGFP ::nrx-1(α)</i>  | TCCATACGGCATCTGTT<br>GCATTC        | TGAAGGTAATAGCTTGA<br>AAGAGA          | 2082          | Hart Lab   |
| pMPH41     | <i>flp-21p::sfGF P::nrx-1(α)</i> | TGAGGTCACGCAACTTG<br>ATGATCATTTTAT | GAAAATGACTTTTTTGGGA<br>TTTTGGAGCAATG | 4099          | this study |
| pMPH42     | <i>nhr-79p::sfGF P::nrx-1(α)</i> | CACGATCATTTTAAGCC<br>AAGTTGTGGCCGT | TTTTATGCTAAAAATCGA<br>TAAATCAAGGAA   | 3000          | this study |
| pMPH43     | <i>srv-3p::sfGFP ::nrx-1(α)</i>  | TCACATTTGCCACCAA<br>TTGCCGTTGCCA   | TTTTGGAGGAGAAAGTT<br>GAGCAAATAGTAG   | 770           | this study |
| pMPH44     | <i>sra-6p::sfGFP ::nrx-1(α)</i>  | CTGAGGTGCATTTGCGA<br>GGGGCACTTCAGA | GGCAAATCTGAAATAAT<br>AAATATTAATT     | 2408          | this study |
| pMPH45     | <i>ric-19p::sfGF P::nlg-1</i>    | CATTAAAGAGTGTGCTC<br>CACGAGCC      | GTTCAAAGTGAAGAGCT<br>CTCTCGAC        | 147           | this study |
| pMPH46     | <i>nhr-79p::sfGF P::nlg-1</i>    | CACGATCATTTTAAGCC<br>AAGTTGTGGCCGT | TTTTATGCTAAAAATCGA<br>TAAATCAAGGAA   | 3000          | this study |
| pMPH47     | <i>nlp-56p::sfGF P::nlg-1</i>    | TTCCAAATCCGAACTTC<br>CAGCTCAAATGAC | CTGGAAGAGTTGAATCA<br>TATGGTTTAGAAG   | 721           | this study |

|        |                                                        |                                    |                                    |      |            |
|--------|--------------------------------------------------------|------------------------------------|------------------------------------|------|------------|
| pMPH48 | <i>nhr-79p::eat-4::SL2::gf p</i>                       | CACGATCATTTTAAGCC<br>AAGTTGTGGCCGT | TTTTATGCTAAAAATCGA<br>TAAATCAAGGAA | 3000 | this study |
| pMPH49 | <i>srv-3p::eat-4::SL2::gf p</i>                        | TCACATTTGCCACCAAA<br>TTGCCGGTTGCCA | TTTTGGAGGAGAAAGTT<br>GAGCAAATAGTAG | 770  | this study |
| pMPH50 | <i>sra-6p::eat-4::SL2::gf p</i>                        | CTGAGGTGCATTTGCGA<br>GGGGCACTTCAGA | GGCAAAATCTGAAATAAT<br>AAATATTAAT   | 2408 | this study |
| pMPH51 | <i>srv-3p::gfp::cla-1</i>                              | TCACATTTGCCACCAAA<br>TTGCCGGTTGCCA | TTTTGGAGGAGAAAGTT<br>GAGCAAATAGTAG | 770  | this study |
| pMPH52 | <i>sra-6:gfp::cla-1</i>                                | CTGAGGTGCATTTGCGA<br>GGGGCACTTCAGA | GGCAAAATCTGAAATAAT<br>AAATATTAAT   | 2408 | this study |
| pMPH53 | <i>sre-1p::sfGFP<br/>::nrx-1(<math>\alpha</math>)</i>  | GGGCGGGGCTATCTGC<br>AAACAATGCAATGC | GAGGACATTTAAAAACC<br>GGCGAGTATTGTA | 1100 | this study |
| pMPH54 | <i>gcy-36p::sfGF<br/>P::nrx-1(<math>\alpha</math>)</i> | ATGATGTTGGTAGATGG<br>GGTTTGGATTCAT | TGTTGGGTAGCCCTTGT<br>TTGAATTTACCAC | 1087 | this study |
| pMPH55 | <i>flp-8p::sfGFP<br/>::nrx-1(<math>\alpha</math>)</i>  | AGTGCTCAAATGGAGTC<br>TGCATGAAAATGA | TTTCTACTTGAAAAGTGT<br>GGACTGAGCACT | 3165 | this study |
| pMPH56 | <i>nlp-56p::sfGF<br/>P::nrx-1(<math>\alpha</math>)</i> | TTCAAATCCGAACTTC<br>CAGCTCAAATGAC  | CTGGAAGAGTTGAATCA<br>TATGGTTTAGAAG | 721  | this study |

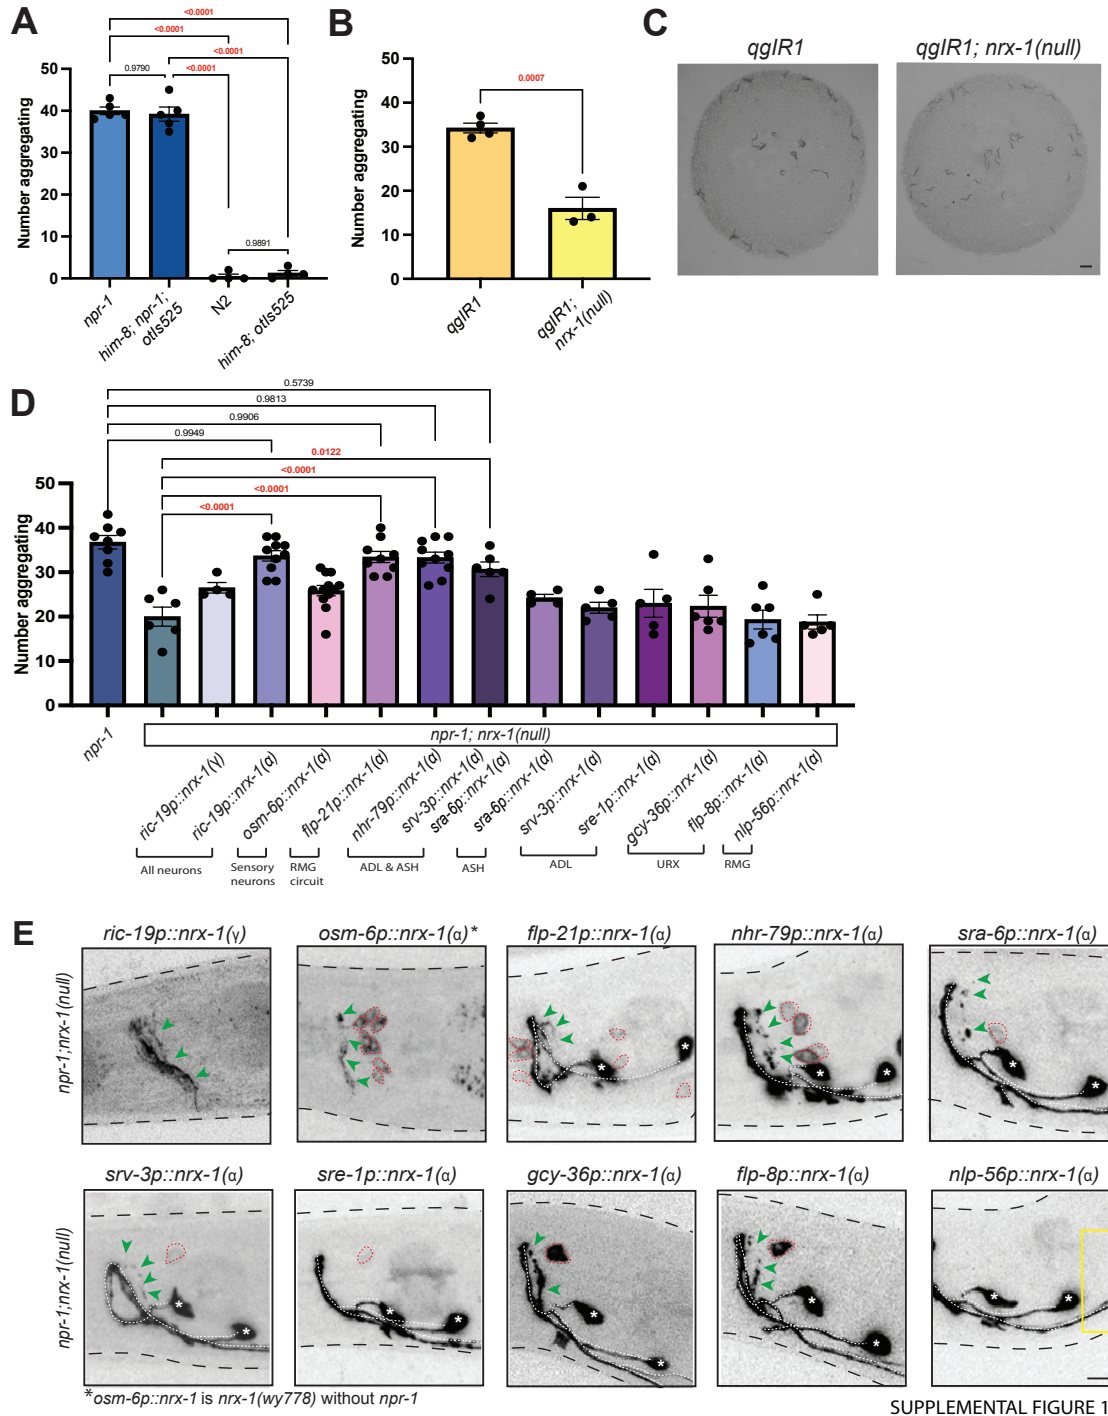

1

2 **Supplemental Figure 1. Confirming role for, expression, and localization, of NRX-1 in**  
 3 **aggregation behavior**

4 A) Graph showing aggregation behavior levels in *npr-1(ad609)* animals compared to *npr-*  
 5 *1(ad609); otIs525;him-8* animals and N2 compared to *otIs525;him-8*. Aggregation behavior was



1 not changed by the presence of *otIs525* or *him-8*. Graph showing number of aggregating animals  
 2 **(B)** and representative images **(C)** of QG1 (*qgIR1*) strain compared to *qgIR1;nrx-*  
 3 *1(wy778);otIs525;him-8* mutants (Scale bar = 1mm). **D)** Graph showing number of aggregating  
 4 animals in *npr-1(ad609)*, *npr-1(ad609);nrx-1(wy778)*, and *npr-1(ad609);nrx-1(wy778)* animals  
 5 with NRX-1( $\gamma$ ) driven under the *ric-19* promoter and NRX-1( $\alpha$ ) driven under promoters indicated.  
 6 **E)** Expression of NRX-1 tagged with sfGFP driven under various promoters. Green arrows  
 7 indicate NRX-1 axonal expression. Red dashed lines show cell bodies. White dashed line indicates  
 8 *lim-6<sup>int4</sup>::gfp* which drives expression in RIS and AVL axons. White asterisks indicate RIS and  
 9 AVL cell bodies. Yellow box in *nlp-56p::nrx-1( $\alpha$ )* indicates area where RMG should be located.  
 10 Expression of *nrx-1* under this promoter is not seen. *osm-6p::nrx-1( $\alpha$ )* imaging performed in *nrx-*  
 11 *1(wy778)*(Scale bar = 10 $\mu$ m).

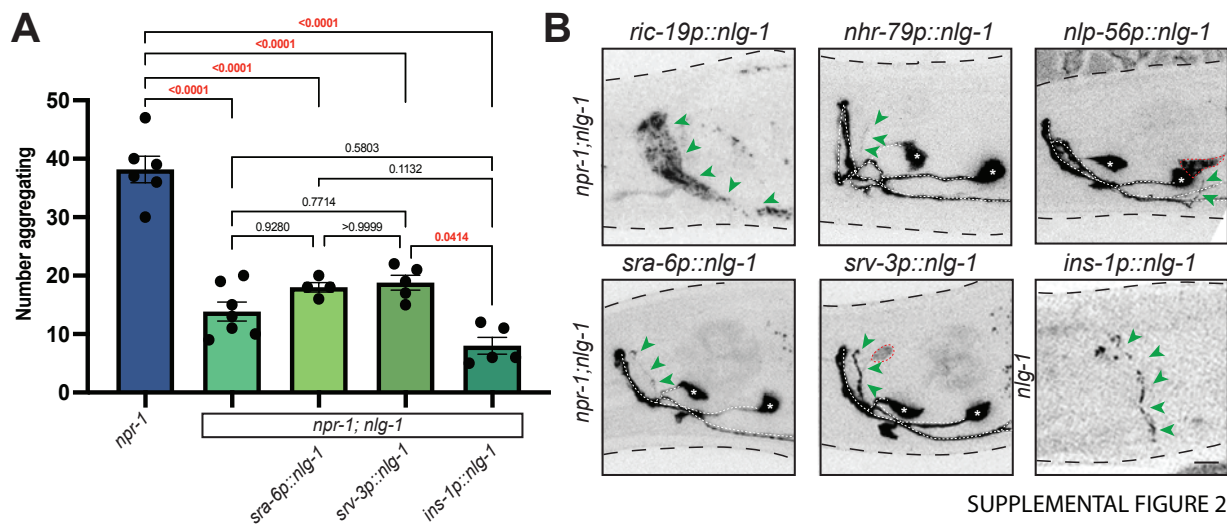

12  
 13 **Supplemental Figure 2. Expression and localization of NLG-1 in aggregation behavior**

14 **A)** Graph showing number of aggregating animals in *npr-1(ad609)*, *npr-1(ad609);nlg-1(ok259)*,  
 15 and *npr-1(ad609);nlg-1(ok259)* with NLG-1 driven under *sra-6*, *srv-3*, and *ins-1* promoters. **B)**  
 16 Expression of NLG-1 tagged with sfGFP driven under various promoters. Green arrows  
 17 indicate NRX-1 axonal expression. Red dashed lines show cell bodies. White dashed line indicates

- 1 *lim-6<sup>int4</sup>::gfp* which drives expression in RIS and AVL axons. White asterisks indicate RIS and
- 2 AVL cell bodies (Scale bar = 10 $\mu$ m).

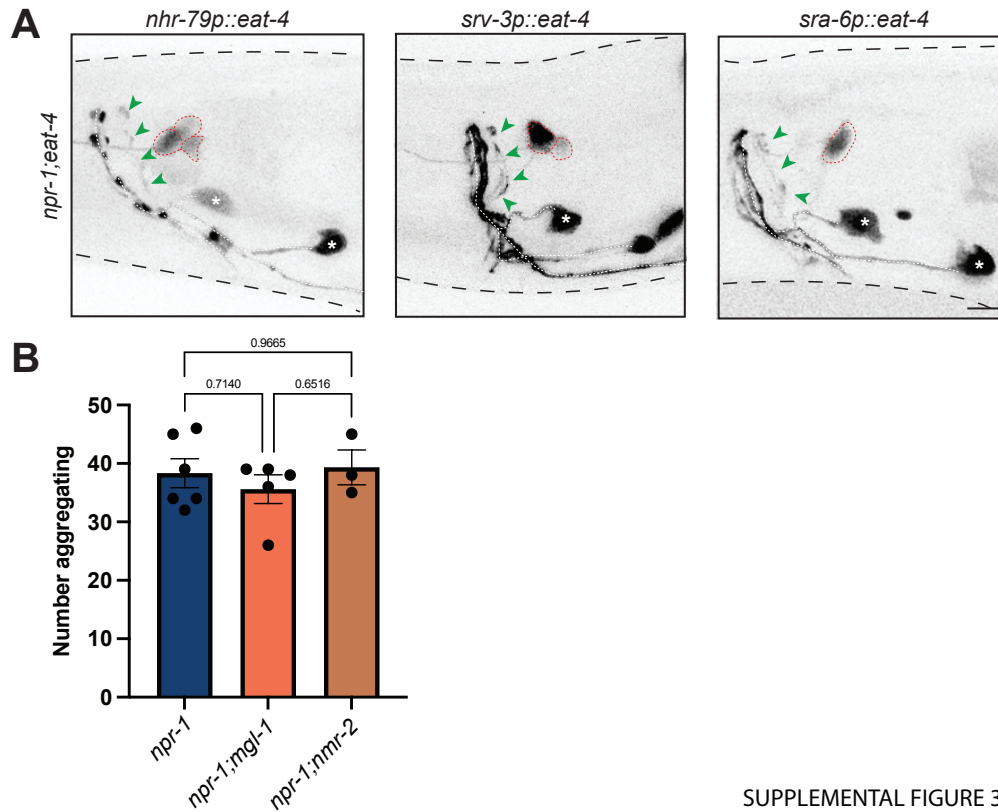

SUPPLEMENTAL FIGURE 3

- 3
- 4 **Supplemental Figure 3. Expression of EAT-4 and analysis of glutamate receptors in**
- 5 **aggregation behavior**

6 A) Expression of EAT-4 tagged with sfGFP driven under *nhr-79p*, *srv-3p*, and *sra-6p* promoters.

7 Green arrows indicate NRX-1 axonal expression. Red dashed lines show cell bodies. White dashed

8 line indicates *lim-6<sup>int4</sup>::gfp* which drives expression in RIS and AVL axons. White asterisks indicate

9 RIS and AVL cell bodies (Scale bar = 10 $\mu$ m). B) Graph showing number of aggregating animals

10 in *npr-1(ad609)*, *npr-1(ad609);mgl-1(tm1811)* and *npr-1(ad609);nmr-2(ok3324)*.

11
